# Supplementary material for: The N-Acetylglucosamine Kinase from Yarrowia lipolytica Is a Moonlighting Protein
Source: MDPI journal article supplement (doi:10.3390/ijms222313109), 2021-12-03
Supplement: s1 [file s1]

**Table S1.** Mutations found in plasmids isolated from clones obtained from the transformation with the mutational library.

| Clon 1         | Clon 2  | Clon 3  | Clon 4         | Clon 5  | Clon 6  |
|----------------|---------|---------|----------------|---------|---------|
| H 12Q          | M1K     | H 12 Q  | K 108 M        | H 28 P  | I 185 T |
| S 303 T        | T 96P   | S 134 T | D115 E         | N 69 Y  | K 234 E |
| <b>F 320 S</b> | I 217 V | S 159 P | N 157 D        | K 288 R | V 378 M |
| I 397 V        | T 235 S | K 280 Q | <b>D 214 V</b> | T 360 S |         |
|                |         | L 340 R | F 320 Y        |         |         |

The two mutations that were selected for further studies are marked in red
